# Supplementary material for: Edible Flower Species as a Promising Source of Specialized Metabolites
Source: MDPI journal article supplement (doi:10.3390/plants11192529), 2022-09-27
Supplement: s1 [file s1]

Article

# Edible Flower Species as a Promising Source of Specialized Metabolites

Mia Dujmović <sup>1</sup>, Sanja Radman <sup>2,\*</sup>, Nevena Opačić <sup>2</sup>, Sanja Fabek Uher <sup>2</sup>, Vida Mikuličin <sup>1</sup>, Sandra Voća <sup>1</sup> and Jana Šic Žlabur <sup>1</sup>

<sup>1</sup> Department of Agricultural Technology, Storage and Transport, University of Zagreb Faculty of Agriculture, Svetošimunska cesta 25, 10000 Zagreb, Croatia

<sup>2</sup> Department of Vegetable Crops, University of Zagreb Faculty of Agriculture, Svetošimunska cesta 25, 10000 Zagreb, Croatia

\* Correspondence: [sradman@agr.hr](mailto:sradman@agr.hr)

Table S1. Flower species used in study

| Picture of flower species                                                           | Scientific name                 | Common name and synonyms                           | Family        |
|-------------------------------------------------------------------------------------|---------------------------------|----------------------------------------------------|---------------|
|    | <i>Calendula officinalis</i> L. | Common marigold<br>Pot marigold<br>Calendula       | Asteraceae    |
|    | <i>Tagetes erecta</i> L.        | African marigold<br>Aztec marigold<br>Big marigold | Asteraceae    |
|   | <i>Tropaeolum majus</i> L.      | Nasturtium<br>Indian cress<br>Monk's cress         | Tropaeolaceae |
|  | <i>Cucurbita pepo</i> L.        | Zucchini<br>Pumpkin                                | Cucurbitaceae |
|  | <i>Centaurea cyanus</i> L.      | Cornflower<br>Bachelor's button                    | Asteraceae    |
